# Supplementary material for: Tumor-Like Stem Cells Derived from Human Keloid Are Governed by the Inflammatory Niche Driven by IL-17/IL-6 Axis
Source: PubMed Central journal article supplement (PMC2771422; doi:10.1371/journal.pone.0007798), 2009-11-11
Supplement: pone.0007798.s002.pdf [file pone.0007798.s002.pdf]

**Table S1: Antibodies for immunostaining and neutralization**

| Antibodies                                             | Host | Immunoglobulin | Vendor         |
|--------------------------------------------------------|------|----------------|----------------|
| Actin, beta ( $\beta$ -actin)                          | *Ms  | Monoclonal IgG | Sigma          |
| 5-bromo-2-deoxyuridine (BrdU)                          | Ms   | Monoclonal IgG | Sigma          |
| Catenin, beta ( $\beta$ -catenin)                      | Ms   | Monoclonal IgG | Cell signaling |
| CD3                                                    | Ms   | Monoclonal IgG | BioLegend      |
| CD29, PE-conjugated                                    | Ms   | Monoclonal IgG | BD Bioscience  |
| CD34, PE-conjugated                                    | Ms   | Monoclonal IgG | BD Bioscience  |
| CD45, PE-conjugated                                    | Ms   | Monoclonal IgG | BD Bioscience  |
| CD73, FITC-conjugated                                  | Ms   | Monoclonal IgG | BD Bioscience  |
| CD90, FITC-conjugated                                  | Ms   | Monoclonal IgG | BD Bioscience  |
| CD105, FITC-conjugated                                 | Ms   | Monoclonal IgG | BD Bioscience  |
| CD146, PE-conjugated                                   | Ms   | Monoclonal IgG | BD Bioscience  |
| Mouse CD3 $\epsilon$                                   | Ham  | Monoclonal IgG | BD Bioscience  |
| Mouse CD28                                             | Ham  | Monoclonal IgG | BD Bioscience  |
| Collagen, type I (Col-I)                               | Ms   | Monoclonal IgG | Sigma          |
| 2', 3'-cyclic nucleotide 3'-phosphodiesterase (CNPase) | Ms   | Monoclonal IgG | Sigma          |
| Fibronectin (FN)                                       | Rb   | Polyclonal IgG | Sigma          |
| Glial fibrillary acidic protein (GFAP)                 | Rb   | Polyclonal IgG | Sigma          |
| Interleukin 6, for immunostaining (IL-6)               | Ms   | Monoclonal IgG | Chemicon       |
| Interleukin 6, for neutralization (IL-6Ab)             | Ms   | Monoclonal IgG | R&D Systems    |
| Interleukin 6 receptor (IL-6R)                         | Ms   | Monoclonal IgG | Chemicon       |
| Interleukin 17, for immunostaining (IL-17)             | Go   | Polyclonal IgG | Santa Cruz     |
| Interleukin 17, for neutralization (IL-17Ab)           | Ms   | Monoclonal IgG | R&D Systems    |
| Interleukin 17 receptor (IL-17R)                       | Ms   | Monoclonal IgG | Santa Cruz     |
| Mitochondria, human (Mt)                               | Ms   | Monoclonal IgG | Chemicon       |
| Nestin                                                 | Ms   | Monoclonal IgG | Sigma          |
| Neurofilament (NFL)                                    | Ms   | Monoclonal IgG | Sigma          |
| Octamer-4 (Oct-4)                                      | Rb   | Polyclonal IgG | Chemicon       |
| Octamer-4 (Oct-4)                                      | Ms   | Monoclonal IgG | Santa Cruz     |
| Proliferative cell nuclear antigen (PCNA)              | Rb   | Polyclonal IgG | Santa Cruz     |
| Smooth muscle actin, alpha ( $\alpha$ -SMA)            | Ms   | Monoclonal IgG | Sigma          |
| Stage specific embryonic antigen 4 (SSEA-4)            | Ms   | Monoclonal IgG | Chemicon       |
| Stro-1                                                 | Ms   | Monoclonal IgM | ATCC           |
| Telomerase reverse transcriptase, human (hTERT)        | Ms   | Monoclonal IgM | Novus          |
| Tubulin III, beta ( $\beta$ -tubulin III)              | Ms   | Monoclonal IgG | Sigma          |
| Vitronectin (VN)                                       | Rb   | Polyclonal IgG | Sigma          |

\*Go: goat, Ms: mouse, Rb: rabbit, Ham: hamster
