# Supplementary material for: Tumor-Like Stem Cells Derived from Human Keloid Are Governed by the Inflammatory Niche Driven by IL-17/IL-6 Axis
Source: PubMed Central journal article supplement (PMC2771422; doi:10.1371/journal.pone.0007798), 2009-11-11
Supplement: pone.0007798.s003.pdf [file pone.0007798.s003.pdf]

**Table S2: RT-PCR primer sequences**

| <b>Genes</b>                    | <b>Upper primer (5'-3')</b> | <b>Lower primer (5'-3')</b> |
|---------------------------------|-----------------------------|-----------------------------|
| <i>Oct-4</i>                    | CGCACCACTGGCATTG TCAT       | TTTCCTTGATGTCACGCAC         |
| <i>Rex-1</i>                    | TGAAAGCCCACA TCCTAACG       | CAAGCTATCCTCCTGCTTTGG       |
| <i>Nanog</i>                    | AATACCTCAGCCTCCAGCAGATG     | CTGCGTCACACCATTGCTATTCT     |
| <i>Pax3</i>                     | CATCCGGCCCTGCGTCATCTC       | TGGCCTT CTTCTCGCTTTCCCTCTG  |
| <i>Slug</i>                     | CATCTTTGGGGCGAGTGAGTCC      | CCCCCGTGTGAGTTCTAATGTGTC    |
| <i>hTERT</i>                    | AGCCAGTCTCACCTTCAACCGC      | GGAGTAGCAGAGGGAGGCCG        |
| <i>LPL</i>                      | CTGGTCGAAGCATTGGAAT         | TGTAGGGCATCTGAGAACGAG       |
| <i>PPAR<math>\gamma</math>2</i> | TCAGTGGAGACCGCCCA           | TCTGAGGTCTGTCATTTTCTGGAG    |
| <i><math>\alpha</math>2</i>     | GAAGTAGGAGTGGGCTTTGC        | CATGACGCATTCCACCACCA        |
| <i>Osteocalcin</i>              | TGAAGAGACCCAGGCGCTA         | GATGTGGTCAGCCAACTCGTC       |
| <i>IL-6</i>                     | ATGTAGCCGCCCCACACAGA        | GCATCCATCTTTTTCAGCCATC      |
| <i>IL-6R</i>                    | CATGCTTTGGGTGGAATGGAC       | CATCAACAGGAAGTTGGTCCC       |
| <i>IL-17</i>                    | GTGAAGGCAGGAATCACAATC       | ACCAGGATCTCTTGCTGGAT        |
| <i>IL-17R</i>                   | GATGACAGCTGGATTACC          | CTCATATTCTGGTCAGGG          |
| <i><math>\beta</math>-actin</i> | TCAAGATCATTGCTCCTCCTG       | CTGCTTGCTGATCCACATCTG       |
