# Supplementary material for: Tumor-Like Stem Cells Derived from Human Keloid Are Governed by the Inflammatory Niche Driven by IL-17/IL-6 Axis
Source: PubMed Central journal article supplement (PMC2771422; doi:10.1371/journal.pone.0007798), 2009-11-11
Supplement: pone.0007798.s004.pdf [file pone.0007798.s004.pdf]

**Table S3: Quantification of cytokine antibody array\***

| Cytokines | Normal Skin | Keloid    | Keloid/Normal | Cytokines    | Normal Skin | Keloid   | Keloid/Normal |
|-----------|-------------|-----------|---------------|--------------|-------------|----------|---------------|
| ENA-78    | 763.50      | 1,051.12  | 1.33          | MCP-1        | 5,019.00    | 7,159.57 | 1.43          |
| G-CSF     | 173.50      | 241.72    | 1.39          | MCP-2        | 142.66      | 182.67   | 1.28          |
| GM-CSF    | 153.00      | 187.47    | 1.23          | MCP-3        | 58.43       | 45.85    | 0.78          |
| GRO       | 2,932.50    | 3,056.68  | 1.05          | M-CSF        | 225.50      | 285.40   | 1.26          |
| GRO-alpha | 1,164.00    | 2,349.68  | 2.02          | MDC          | 133.50      | 242.20   | 1.81          |
| I-309     | 102.00      | 118.34    | 1.16          | MIG          | 141.29      | 131.30   | 0.93          |
| IL-1alpha | 167.23      | 186.99    | 1.12          | MIP-1-delta  | 193.00      | 411.66   | 2.13          |
| IL-1beta  | 68.12       | 133.70    | 1.96          | RANTES       | 108.00      | 279.16   | 2.58          |
| IL-2      | 88.00       | 118.34    | 1.34          | SCF          | 250.28      | 565.29   | 2.25          |
| IL-3      | 89.50       | 107.30    | 1.20          | SDF-1        | 73.22       | 63.61    | 0.86          |
| IL-4      | 118.00      | 145.70    | 1.23          | TARC         | 0.00        | 0.00     |               |
| IL-5      | 386.00      | 528.80    | 1.37          | TGF-beta 1   | 566.87      | 1,523.91 | 2.69          |
| IL-6      | 21,616.50   | 62,790.20 | 2.91          | TNF-alpha    | 313.57      | 714.63   | 2.28          |
| IL-7      | 1,141.50    | 1,780.35  | 1.56          | TNF-beta     | 417.50      | 575.37   | 1.38          |
| IL-8      | 24,054.00   | 25,108.55 | 1.04          | EGF          | 231.00      | 324.77   | 1.41          |
| IL-10     | 528.50      | 826.45    | 1.56          | IGF-1        | 291.50      | 374.22   | 1.28          |
| IL12-p40  | 134.87      | 154.34    | 1.14          | Angiogenin   | 494.00      | 3,361.25 | 6.81          |
| IL-13     | 20.81       | 27.60     | 1.32          | Oncostatin M | 111.00      | 166.83   | 1.50          |
| IL-15     | 165.37      | 187.47    | 1.13          | TPO          | 101.00      | 136.10   | 1.35          |
| IFN-gamma | 90.23       | 120.26    | 1.33          | VEGF         | 541.00      | 1755.83  | 3.24          |
| Leptin    | 83.42       | 76.57     | 0.92          | PDGF-BB      | 285.12      | 580.89   | 2.04          |

\*Cytokine profiling of keloid and matched normal skin tissue lysates and differential expression of candidate gene products by Human Cytokine Antibody Array.
