# Supplementary material for: Tumor-Like Stem Cells Derived from Human Keloid Are Governed by the Inflammatory Niche Driven by IL-17/IL-6 Axis
Source: PubMed Central journal article supplement (PMC2771422; doi:10.1371/journal.pone.0007798), 2009-11-11
Supplement: pone.0007798.s005.pdf [file pone.0007798.s005.pdf]

**Table S4: Transplantation with a range of number of dermal stem cells\***

| Cell Number | $1 \times 10^2$ | $1 \times 10^3$ | $1 \times 10^4$ | $1 \times 10^5$ | $5 \times 10^5$ | $1 \times 10^6$ | $2 \times 10^6$ |
|-------------|-----------------|-----------------|-----------------|-----------------|-----------------|-----------------|-----------------|
| SKPs        | -               | -               | -               | -               | 1/3             | 3/3             | 3/3             |
| KPCs        | -               | -               | -               | 2/3             | 3/3             | 3/3             | 3/3             |
